# Supplementary material for: Array-CGH analysis in Rwandan patients presenting development delay/intellectual disability with multiple congenital anomalies
Source: PubMed Central journal article supplement (PMC4123504; doi:10.1186/1471-2350-15-79), 2014-07-12
Supplement: 1471-2350-15-79-S1.pdf [file 1471-2350-15-79-S1.pdf]

# MLPA results

**Results:**

|                |                                                   |                   |                   |
|----------------|---------------------------------------------------|-------------------|-------------------|
| <b>P036-E1</b> | <b>AB13GS307_(130121-0046_P036-E1_F_P)_B04_AB</b> | <b>06/12/2013</b> | <b>All vs all</b> |
| duplication    | 08 q                                              | ZC3H3 (KIAA0      | 361               |
| deletion       | 16 p                                              | POLR3K            | 242               |
| <b>P070-B1</b> | <b>AB13GS307_(130121-0046_P070-B1_F_P)_G04_AB</b> | <b>06/12/2013</b> | <b>All vs all</b> |
| duplication    | 08 q                                              | RECQL4            | 179               |
| deletion       | 16 p                                              | DECR2             | 427               |

**Analysis Mode: All vs all**

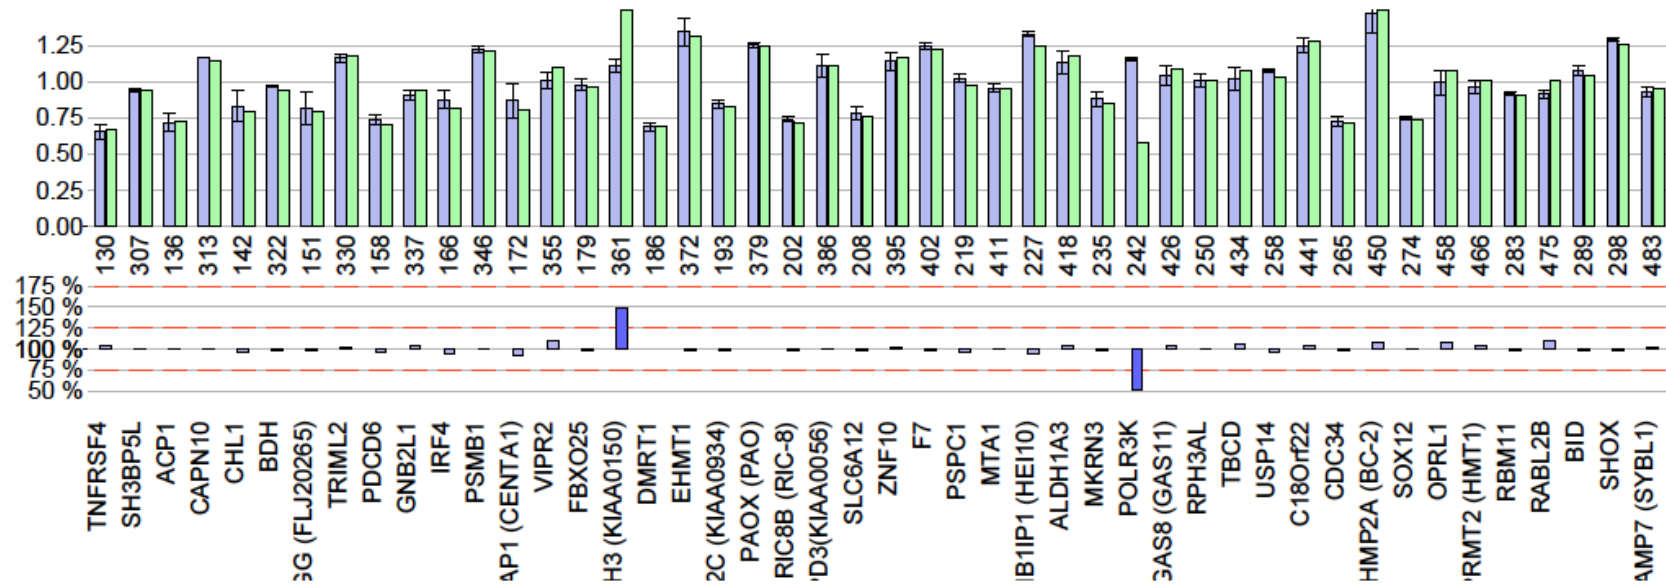

Deletion 8q24.3/16p13.3

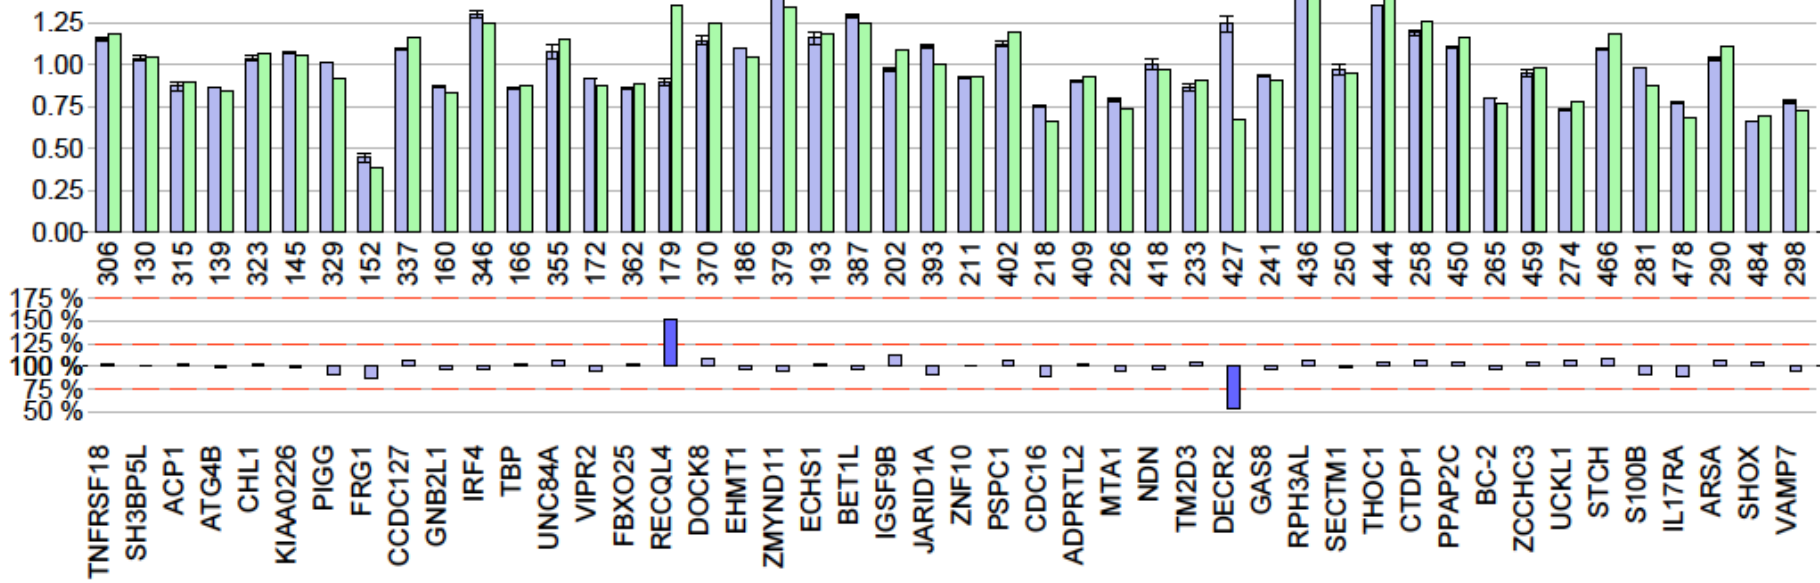

Deletion 8q24.3/16p13.3

Results:

P245-A2 AB13GS307\_(130121-0049\_P245-A2\_M\_P)\_C03\_AB 06/12/2013 All vs all  
 deletion 22 q11.21 CLDN5 196  
 deletion 22 q11.21 GP1BB 208  
 deletion 22 q11.21 SNAP29 373

# Deletion 22q11.21

Resultfile: AB13GS307\_(130121-0049\_P245-A2\_P245-A2 06/12/2013 11:54:00 total peak area: 258917  
 Control: AB13GS307\_(ctrl4-12062013\_P245-A: P245-A2 06/12/2013 11:54:00 compl. TV UA [06/12/2013 14:08:20]  
 Control: AB13GS307\_(ctrl3-12062013\_P245-A: P245-A2 06/12/2013 11:22:00 compl. TV UA [06/12/2013 14:07:24]

data correction: on  
 DNA dosage: ok  
 total peak area: ok  
 max peak area: ok  
 max peak height: ok

Analysis Mode: All vs all

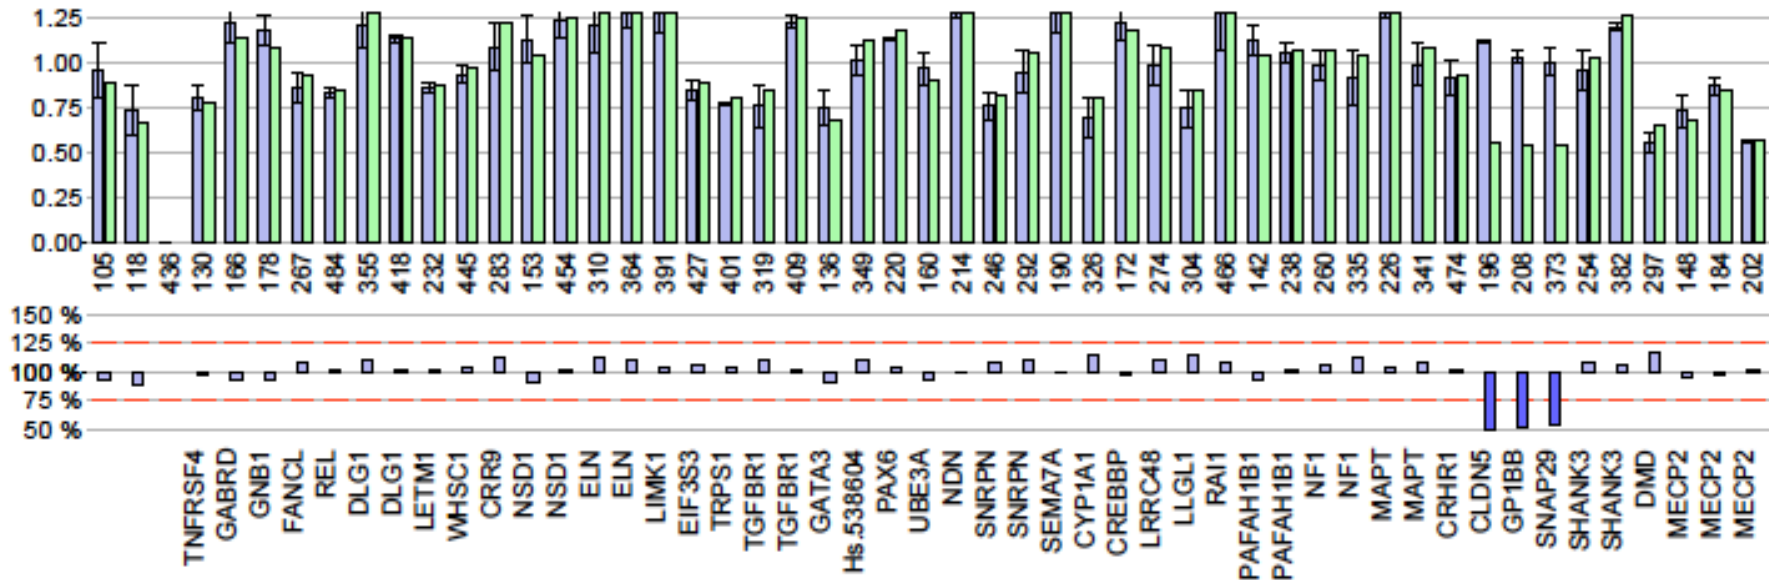

Results:

|         |                                                        |            |                  |
|---------|--------------------------------------------------------|------------|------------------|
| P036-E1 | AB13GS307_(130121-0066_P036-E1_F_P)_A04_ABI 06/12/2013 | All vs all |                  |
|         | deletion                                               | 10 p       | DIP2C (KIAA0193) |
| P070-B1 | AB13GS307_(130121-0066_P070-B1_F_P)_F04_ABI 06/12/2013 | All vs all |                  |
|         | deletion                                               | 10 p       | ZMYND11          |
| P245-A2 | AB13GS307_(130121-0066_P245-A2_F_P)_B03_ABI 06/12/2013 | All vs all |                  |
|         | deletion                                               | 10 p15.1   | GATA3            |
|         | deletion                                               | 10 p15.1   | Hs.538604        |

Resultfile: AB13GS307\_(130121-0066\_P036-E1\_P036-E1 06/12/2013 11:54:00 total peak area: 288301

Control: AB13GS307\_(ctrl1-12062013\_P036-E1\_P036-E1 06/12/2013 11:54:00 compl. TV UA [06/12/2013 13:41:17]

Control: AB13GS307\_(ctrl2-12062013\_P036-E1\_P036-E1 06/12/2013 11:54:00 compl. TV UA [06/12/2013 13:43:11]

data correction: on  
 DNA dosage: ok  
 total peak area: ok  
 max peak area: ok  
 max peak height: ok

# Deletion 10p15.3p14

Analysis Mode: All vs all

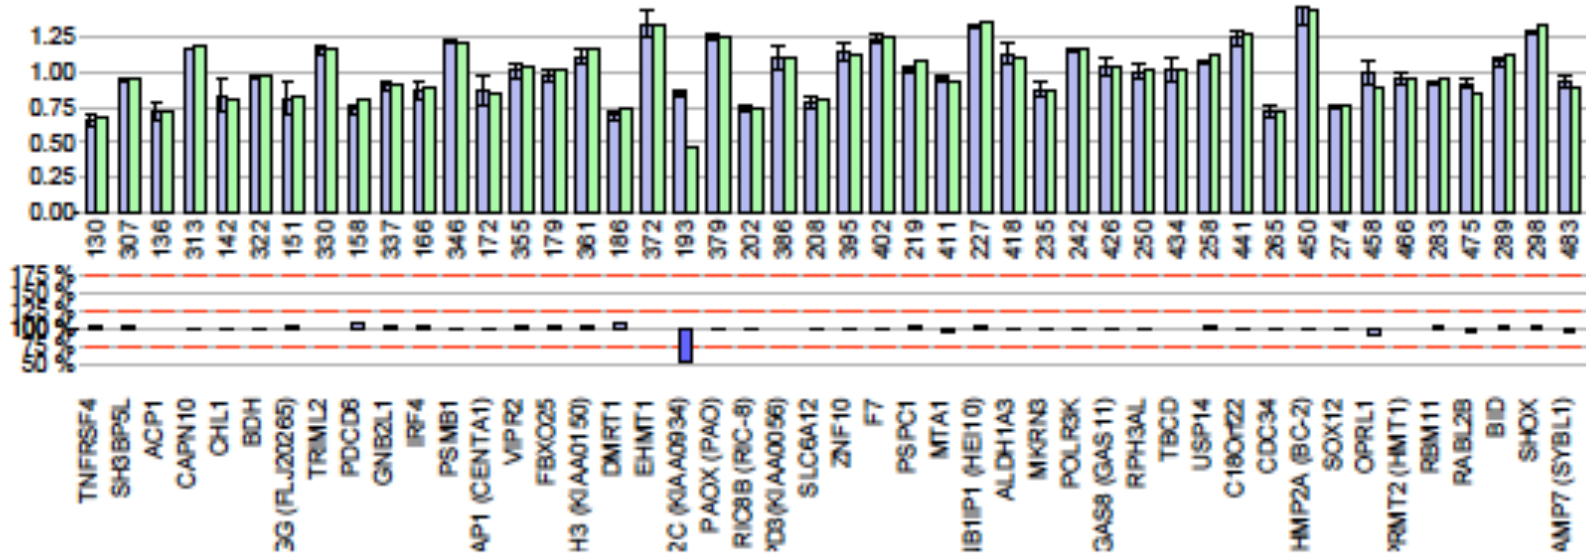

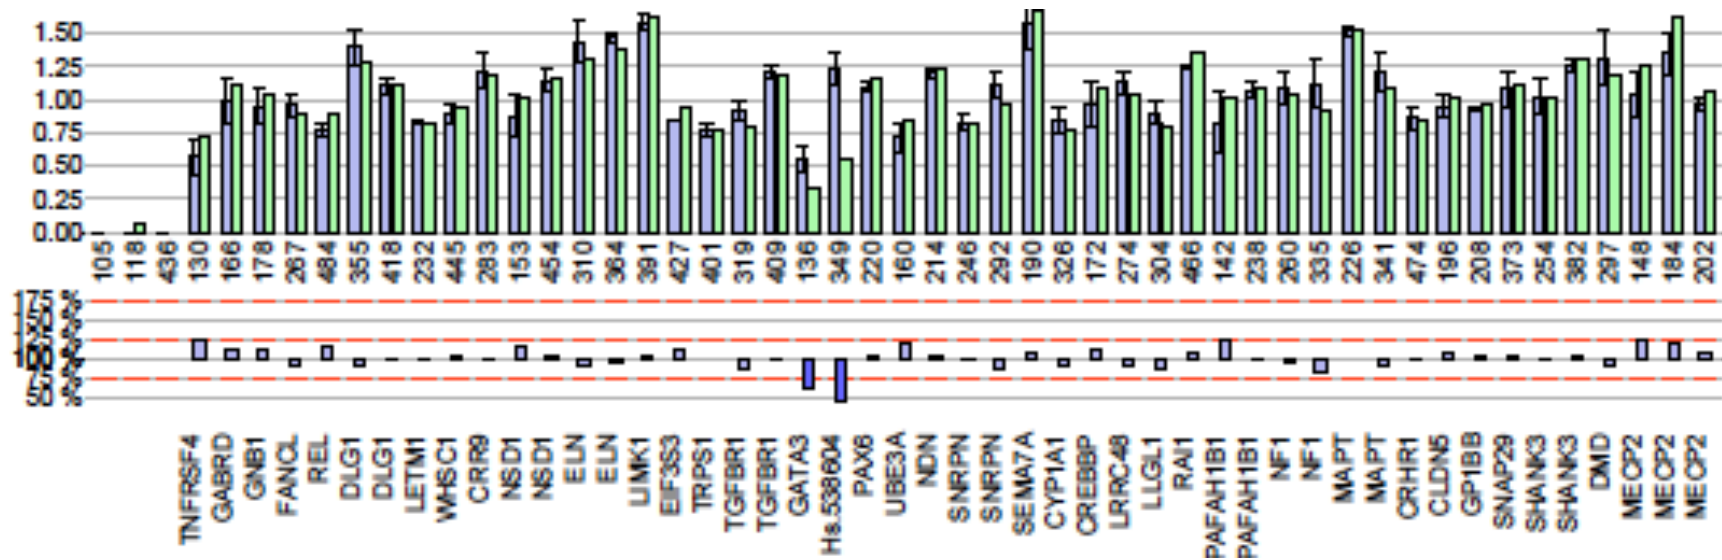

Deletion 10p15.3p14

P245-A2

AB13GS236\_(130121-0103\_P245-A2\_F\_P)\_H10\_AB 05/03/2013

All vs all

duplication

07 q11.23 LIMK1

391

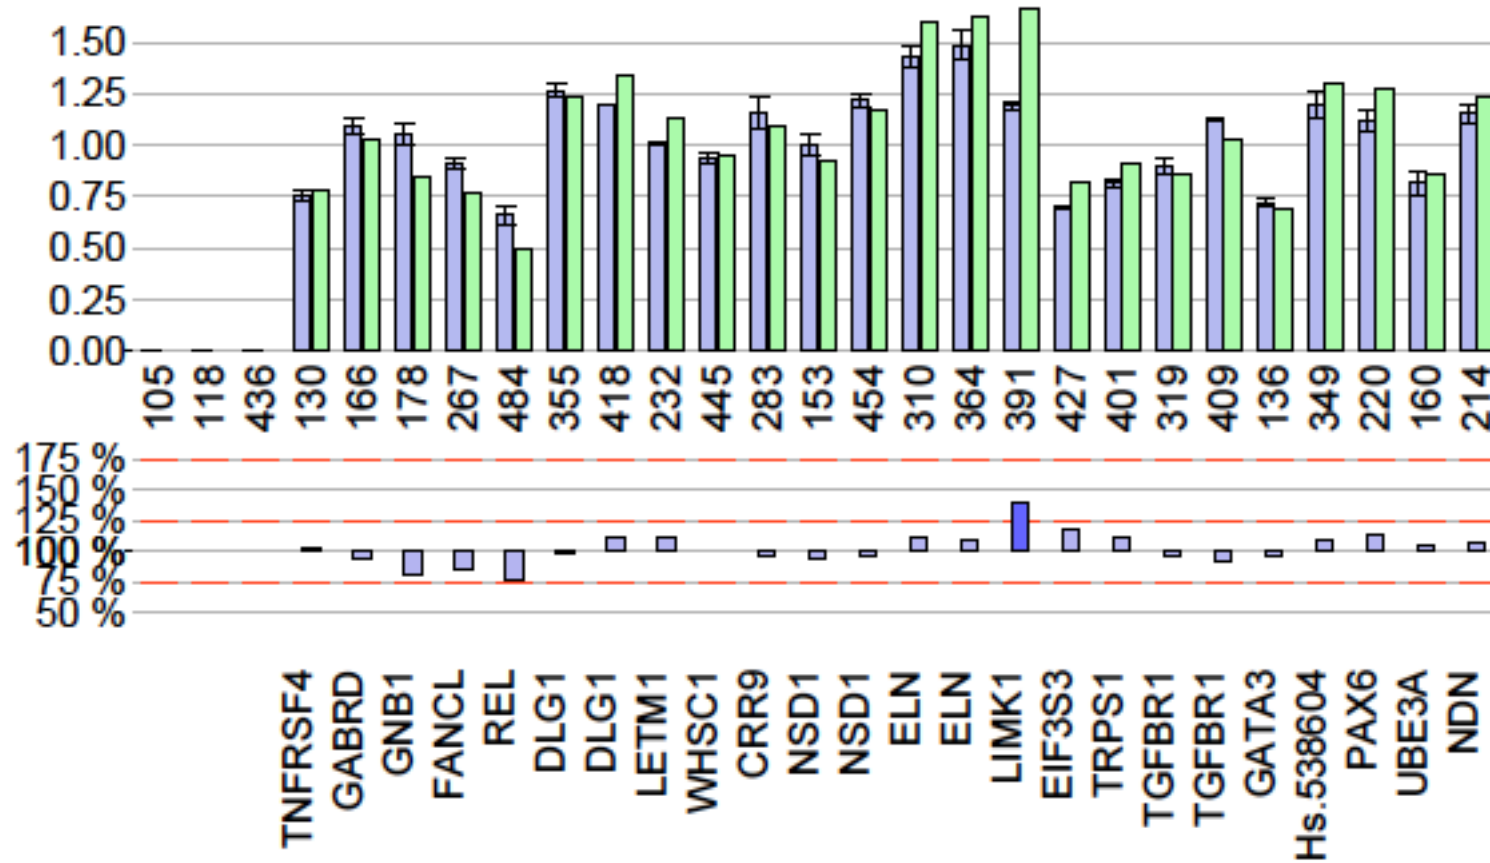

Duplication 7q11.23

**Results:**

**P245-A2**

(110408-0068P\_P245-A2\_M\_P)\_H04\_AB11GS265\_2 06/29/2011

All vs all

|          |    |        |       |     |
|----------|----|--------|-------|-----|
| deletion | 07 | q11.23 | ELN   | 310 |
| deletion | 07 | q11.23 | ELN   | 364 |
| deletion | 07 | q11.23 | LIMK1 | 391 |

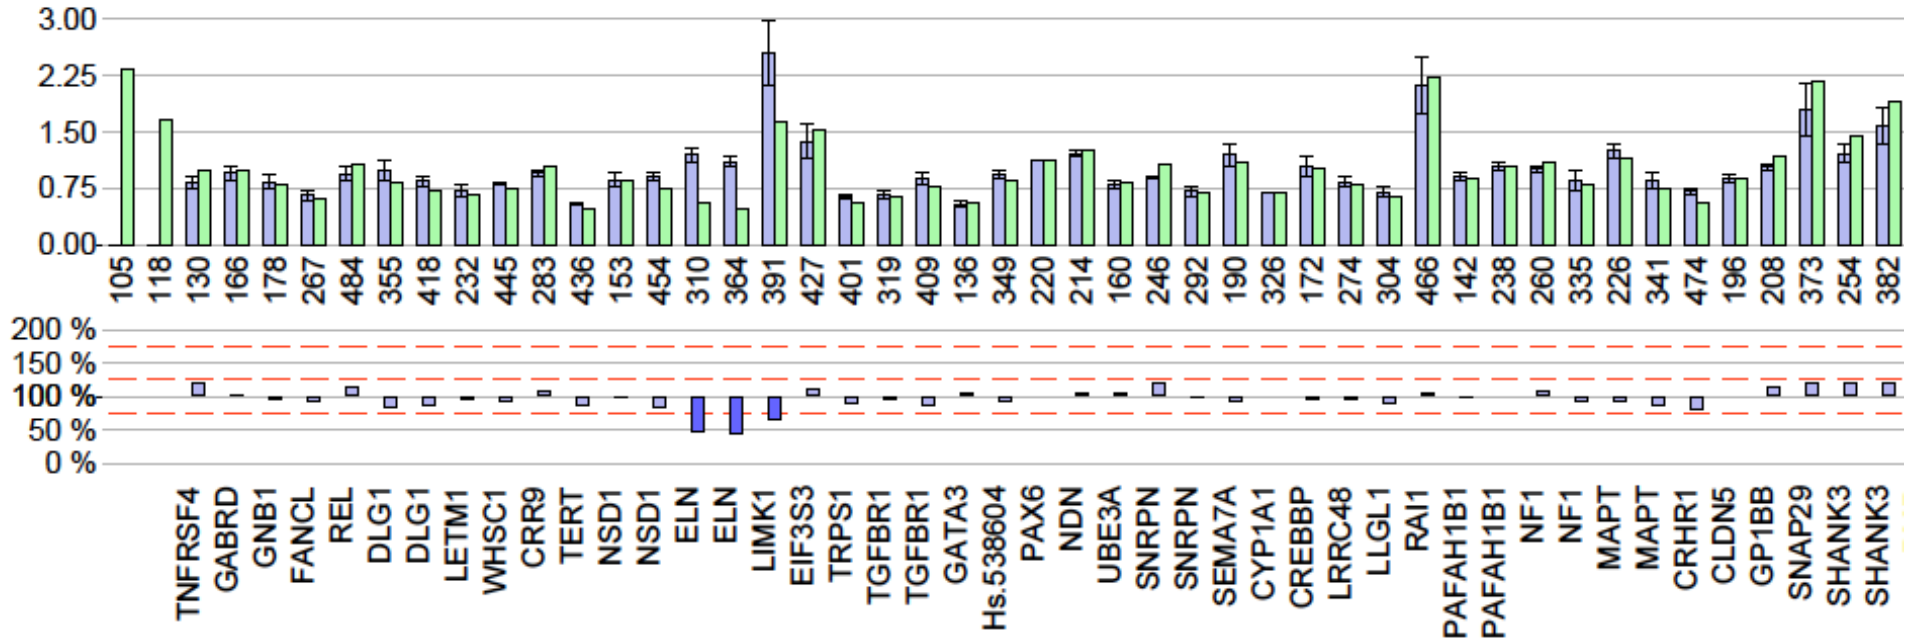

Deletion 7q11.23



P070-B1

(121131-0110P\_P070-B1\_F\_P)\_H09\_AB12GS118\_2( 03/14/2012  
duplication

18 p

THOC1

All vs all

444

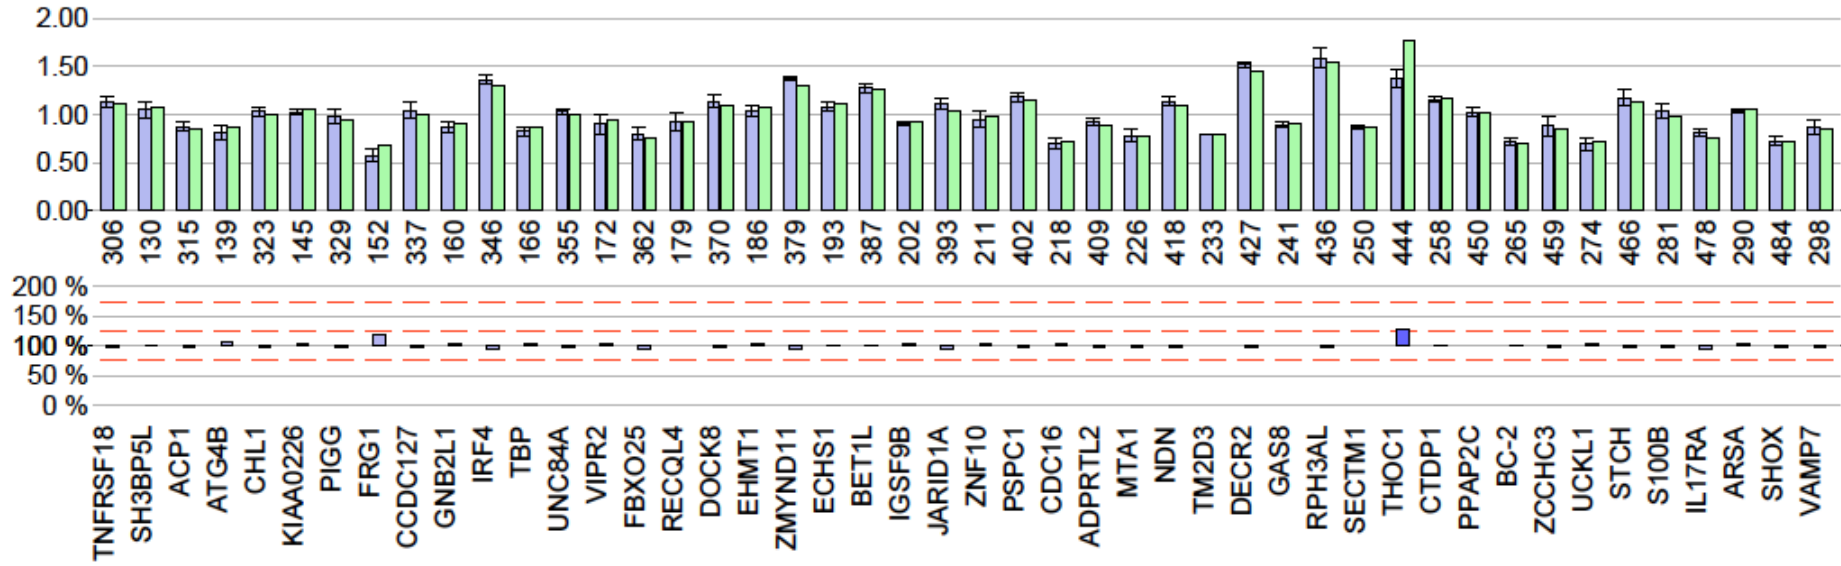

Trisomy 18p

# FISH Results

**Deletion 22q11.22**

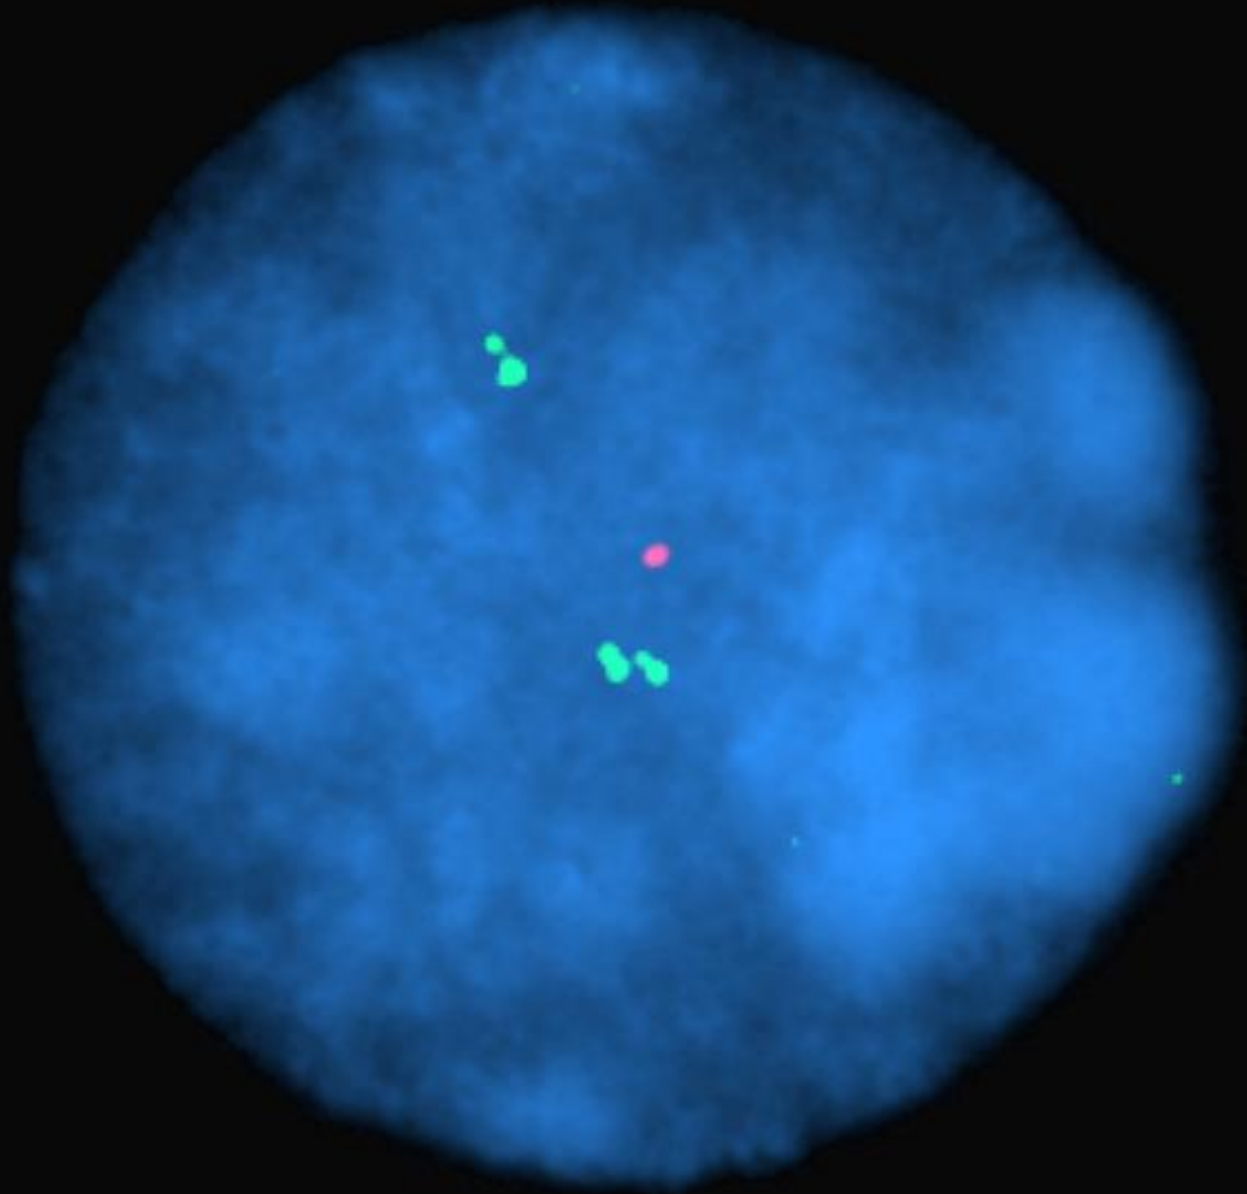

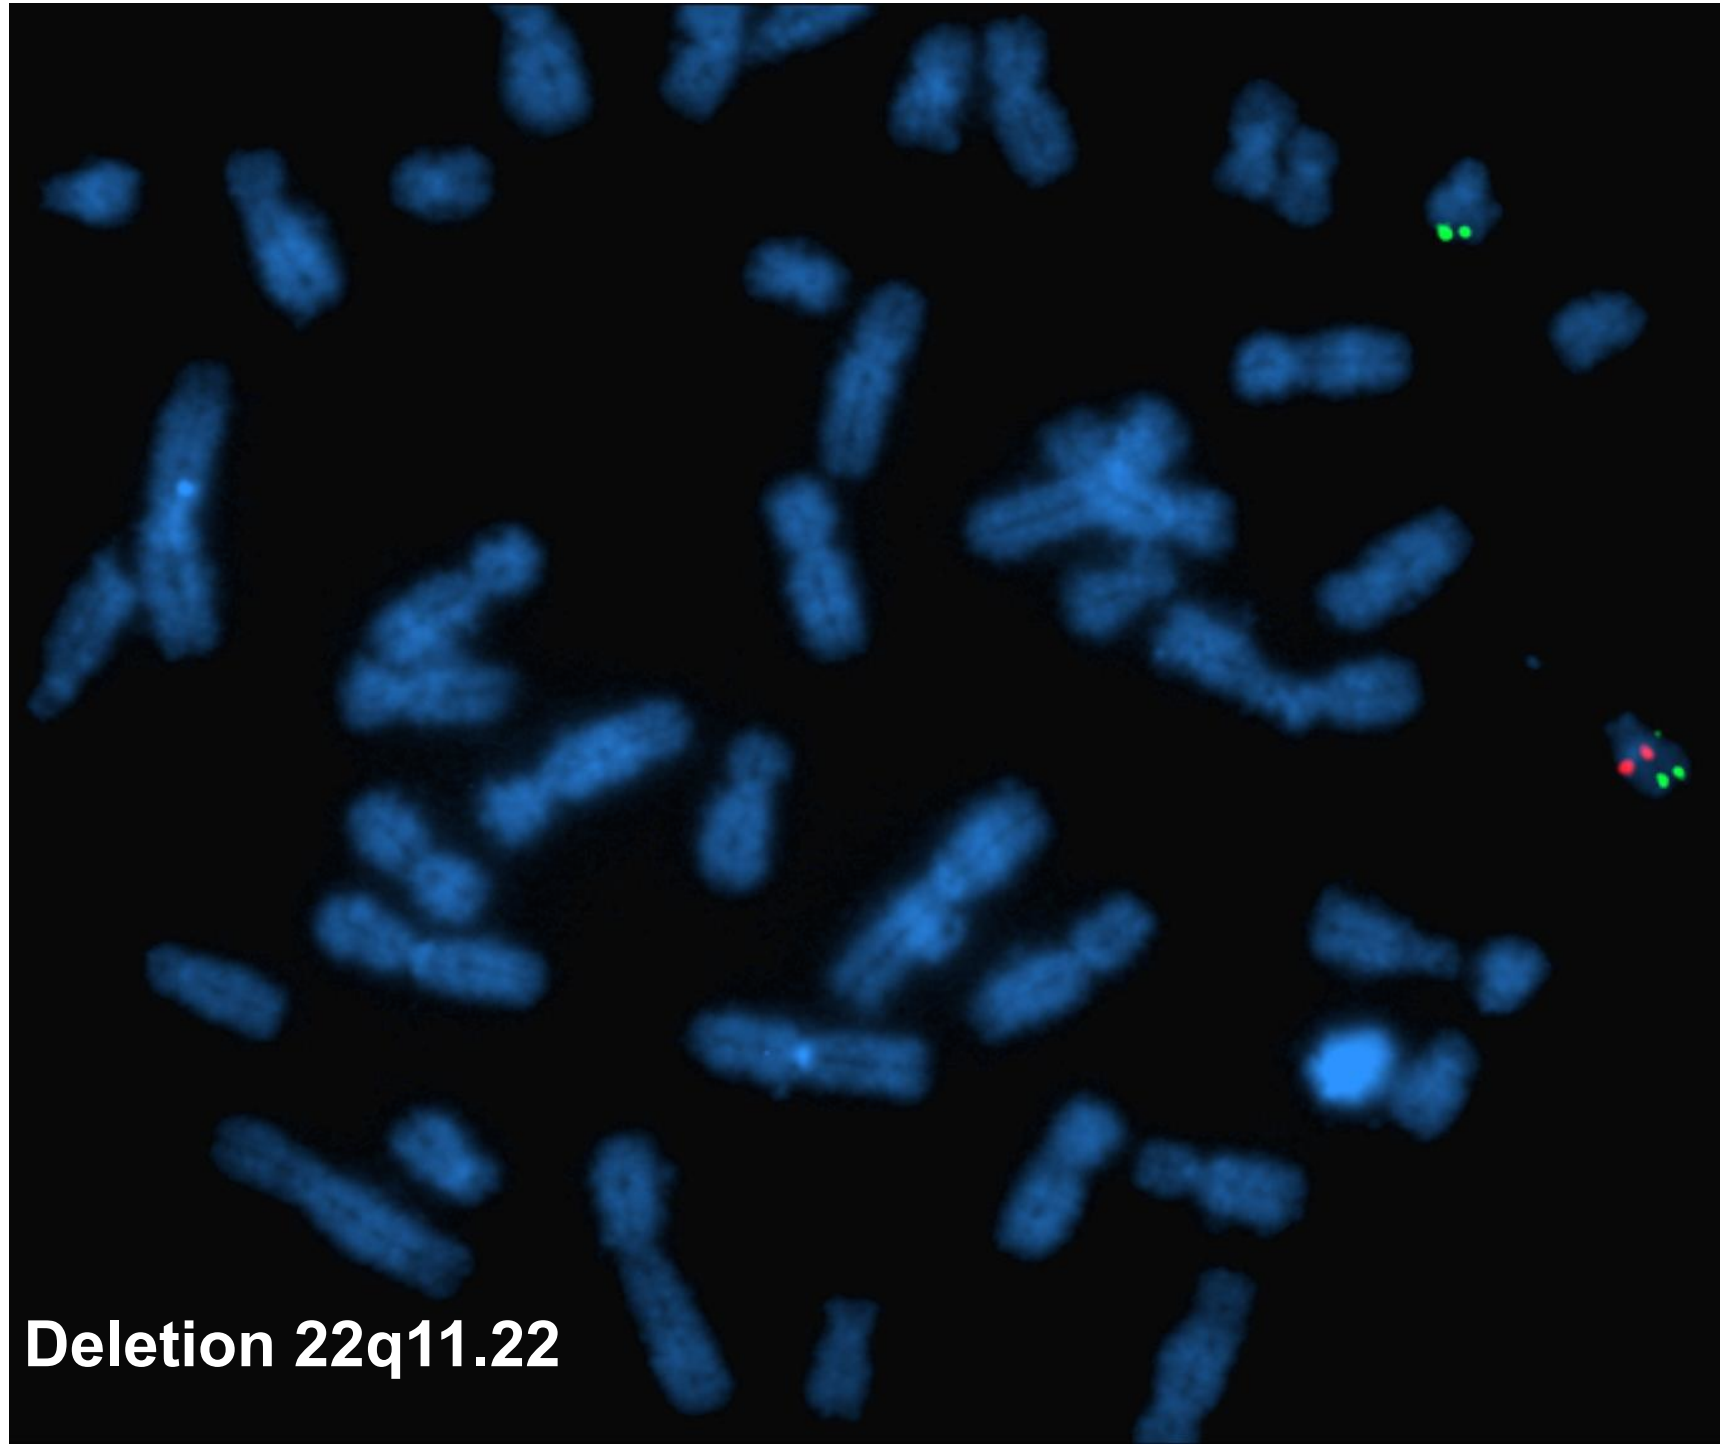

**Deletion 22q11.22**

**Deletion 7q11.23**

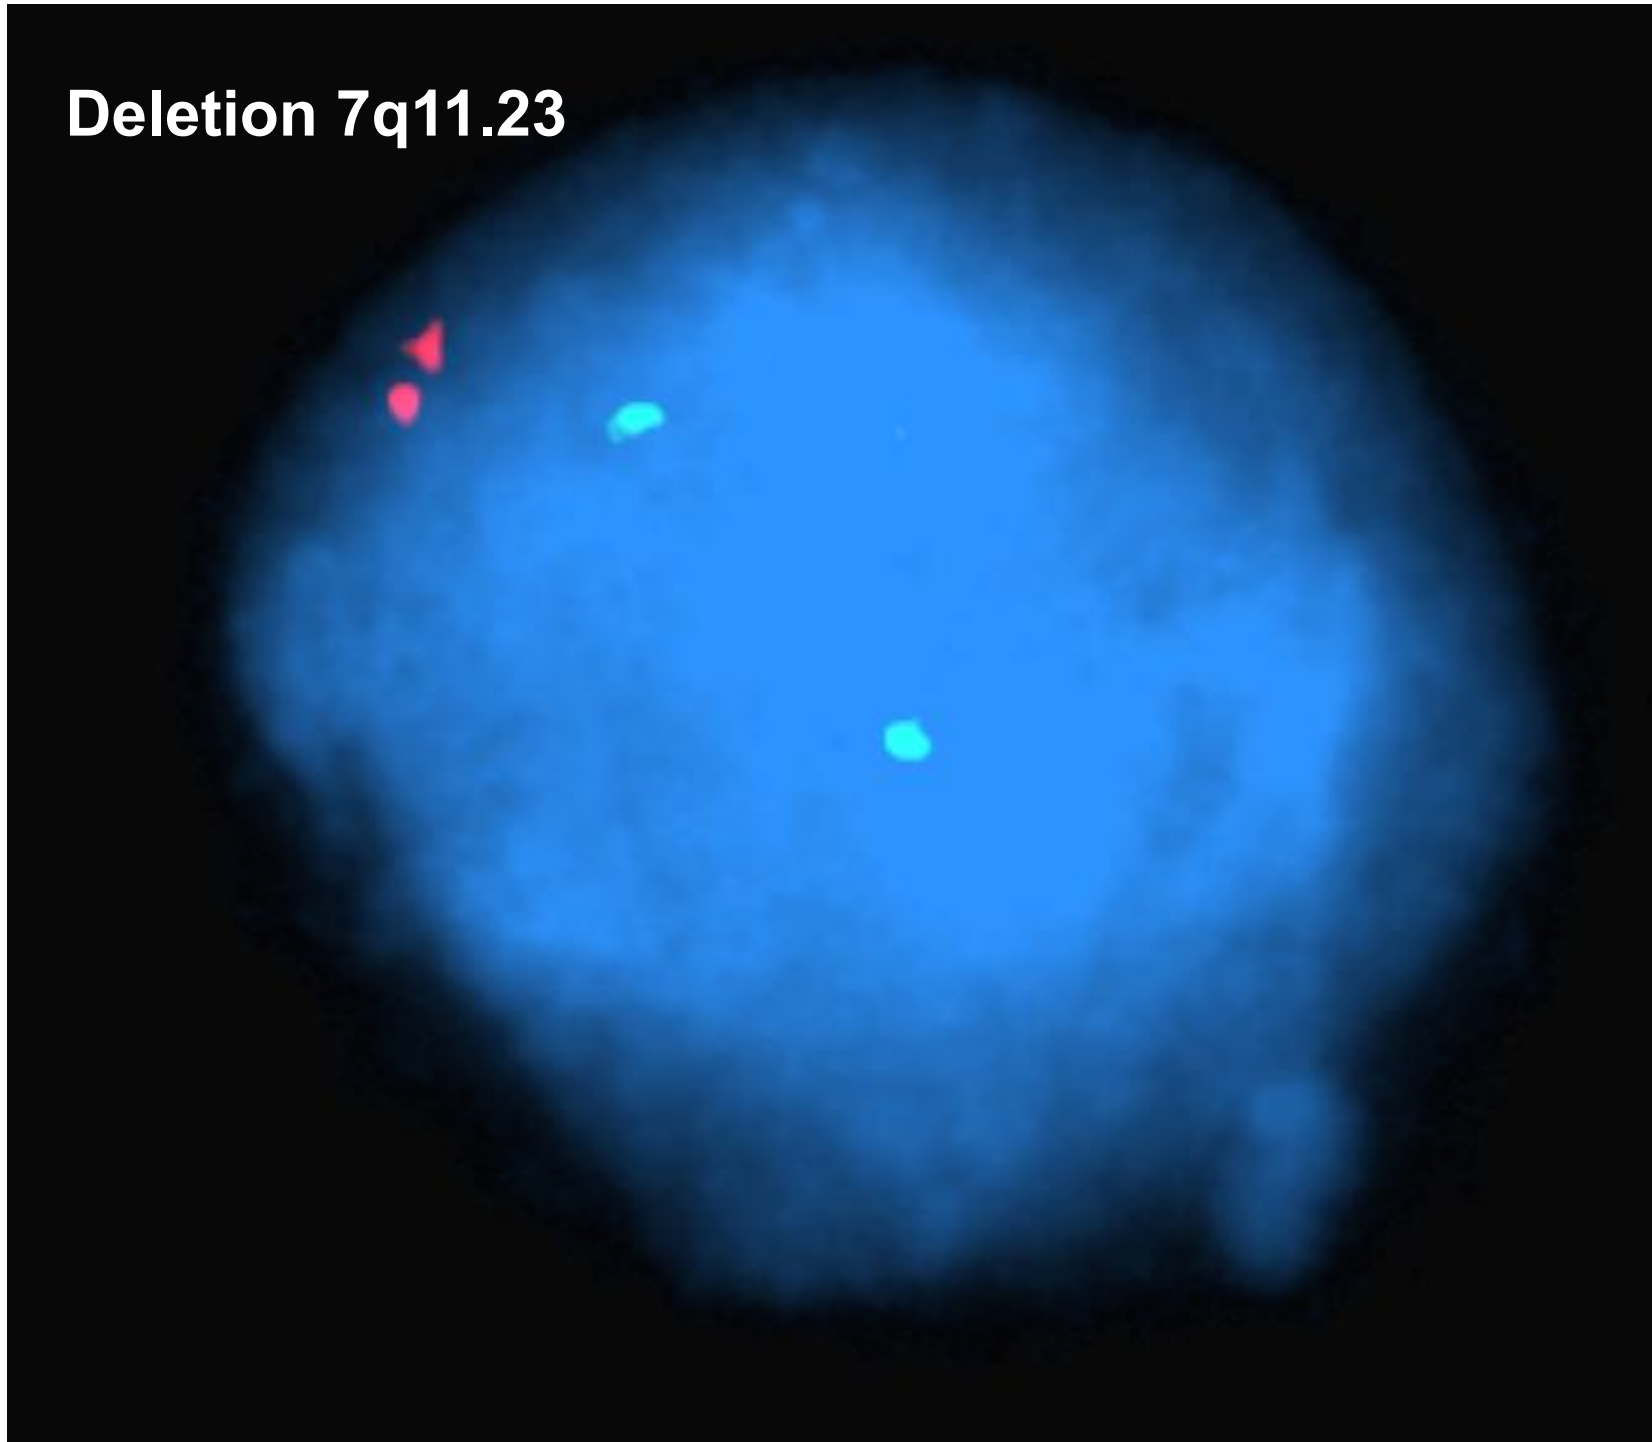

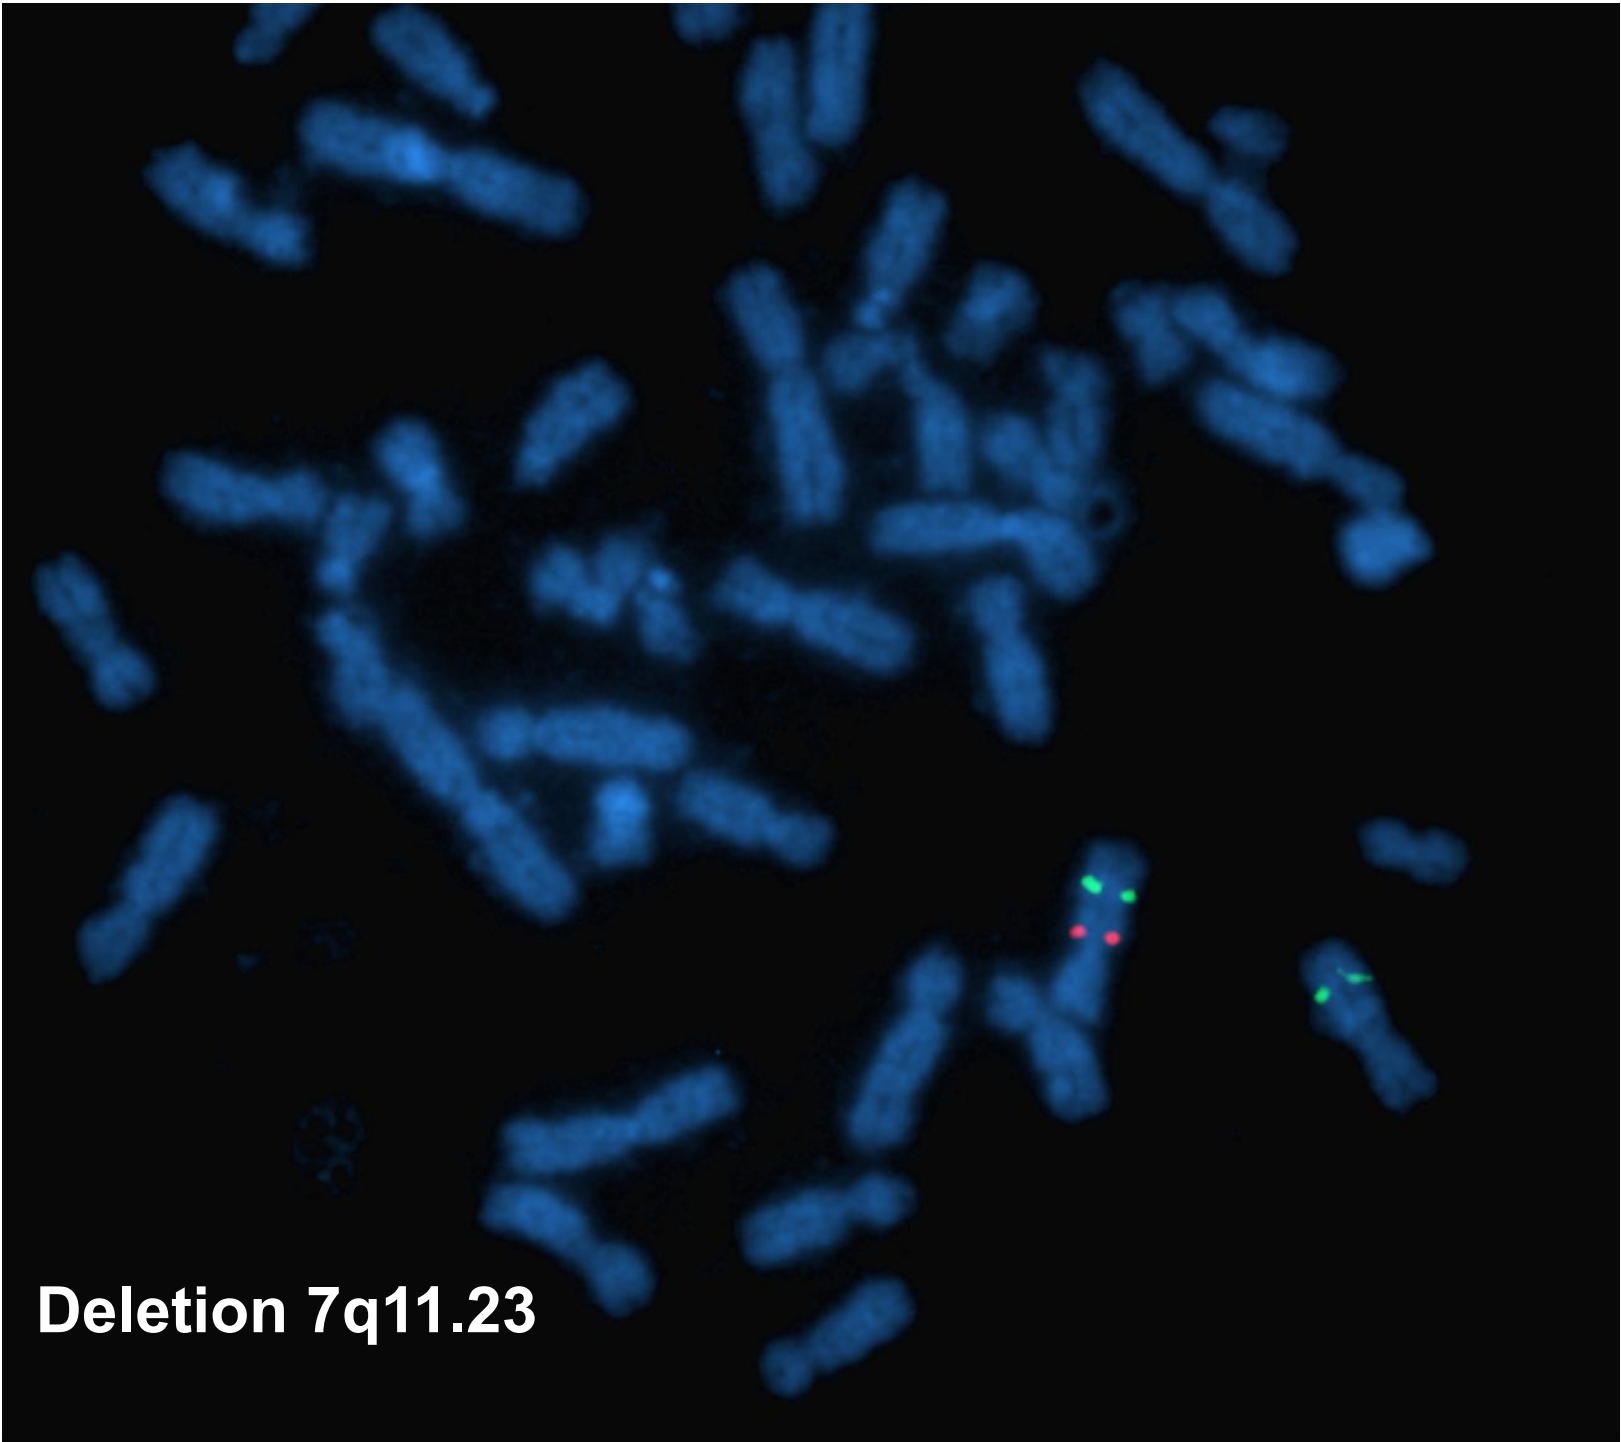

**Deletion 7q11.23**
